# Supplementary material for: Interleukin-18 serum level is elevated in type 2 diabetes and latent autoimmune diabetes
Source: PubMed Central journal article supplement — Endocr Connect. 2017 Dec 7;7(1):179–85. doi: 10.1530/EC-17-0273 (PMC5776671; doi:10.1530/ec-17-0273), 2017-12-07
Supplement: ec-7-179-t001.pdf [file ec-7-179-t001.pdf]

**Table 3. Concentration of GAD65A in participants (IU/ml).**

|                  | <b>T2D</b> | <b>LADA</b> | <b>Controls</b> |
|------------------|------------|-------------|-----------------|
| <b>Mean (SD)</b> | 3 (1)      | 166 (80)    | 3 (1)           |
| <b>Median</b>    | 3          | 180         | 3               |
| <b>Minimum</b>   | 0          | 20          | 2               |
| <b>Maximum</b>   | 9          | 275         | 5               |

T2D- type 2 diabetes; LADA – latent autoimmune diabetes; SD – standard deviation.
